# Supplementary material for: Unveiling the role and life strategies of viruses from the surface to the dark ocean
Source: PubMed Central journal article supplement — Sci Adv. 2017 Sep 6;3(9):e1602565. doi: 10.1126/sciadv.1602565 (PMC5587022; doi:10.1126/sciadv.1602565), 2017-09-06
Supplement: 1602565_SM.pdf [file 1602565_SM.pdf]

## Supplementary Materials for **Unveiling the role and life strategies of viruses from the surface to the dark ocean**

Elena Lara, Dolors Vaqué, Elisabet Laia Sà, Julia A. Boras, Ana Gomes, Encarna Borrull, Cristina Díez-Vives, Eva Teira, Massimo C. Pernice, Francisca C. Garcia, Irene Forn, Yaiza M. Castillo, Aida Peiró, Guillem Salazar, Xosé Anxelu G. Morán, Ramon Massana, Teresa S. Catalá, Gian Marco Luna, Susana Agustí, Marta Estrada, Josep M. Gasol, Carlos M. Duarte

Published 6 September 2017, *Sci. Adv.* **3**, e1602565 (2017)

DOI: 10.1126/sciadv.1602565

### **The PDF file includes:**

- table S1. Mean, SE, median, minimum, and maximum values of viral abundance in each of the water masses identified in the mesopelagic layer (200 to 1000 m).
- table S2. Mean, SE, median, minimum, and maximum values of viral abundance according to the water masses in the bathypelagic layer (1000 to 4000 m).
- table S3. Results of the multivariate multiple regression analyses to explain variability of viral abundance in the epipelagic layer (0 to 200 m).
- table S4. Results of the multivariate multiple regression analyses to explain variability of viral abundance in the mesopelagic layer (200 to 1000 m).
- table S5. Results of the multivariate multiple regression analyses to explain variability of viral abundance in the bathypelagic layer (1000 to 4000 m).
- table S6. Values of  $VP_L$  and  $VP_{LG}$ .
- table S7. Mean and SE of the estimated C, N, and P released by viruses and that incorporated by grazers in the three layers (surface, DCM, and bathypelagic).
- fig. S1. Viral abundance with depth along the entire cruise visualized with Ocean Data View.
- fig. S2.  $VP_L$  and  $VP_{LG}$  and prokaryotic mortality due to viruses.

### **Other Supplementary Material for this manuscript includes the following:**

(available at [advances.sciencemag.org/cgi/content/full/3/9/e1602565/DC1](http://advances.sciencemag.org/cgi/content/full/3/9/e1602565/DC1))

- data file S1 (Microsoft Excel format). List of all the environmental and biological variables used in this study.

## SUPPLEMENTARY INFORMATION

**table S1. Mean, SE, median, minimum, and maximum values of viral abundance in each of the water masses identified in the mesopelagic layer (200 to 1000 m).**

|           | <b>Vol (%)</b> | <b>Mean<br/>(10<sup>6</sup> vir ml<sup>-1</sup>)</b> | <b>SE<br/>(10<sup>5</sup> vir ml<sup>-1</sup>)</b> | <b>Median<br/>(10<sup>6</sup> vir ml<sup>-1</sup>)</b> | <b>Min<br/>(10<sup>5</sup> vir ml<sup>-1</sup>)</b> | <b>Max<br/>(10<sup>6</sup> vir ml<sup>-1</sup>)</b> |
|-----------|----------------|------------------------------------------------------|----------------------------------------------------|--------------------------------------------------------|-----------------------------------------------------|-----------------------------------------------------|
| 13EqAtl   | 1.9            | 0.90                                                 | 1.93                                               | 1.07                                                   | 2.51                                                | 1.66                                                |
| 13EqPac   | 6.0            | 2.21                                                 | 5.93                                               | 1.26                                                   | 1.45                                                | 13.50                                               |
| AAIW      | 8.6            | 0.81                                                 | 0.70                                               | 0.81                                                   | 1.23                                                | 1.82                                                |
| CMW_N Pac | 2.8            | 1.32                                                 | 2.53                                               | 1.20                                                   | 6.76                                                | 3.02                                                |
| ENACW     | 5.1            | 0.93                                                 | 1.20                                               | 0.81                                                   | 1.23                                                | 2.51                                                |
| ICW_13    | 4.1            | 3.93                                                 | 23.60                                              | 1.57                                                   | 7.76                                                | 25.10                                               |
| NPIW      | 6.5            | 1.00                                                 | 1.45                                               | 0.80                                                   | 1.86                                                | 3.47                                                |
| SACW      | 1.6            | 1.66                                                 | 4.56                                               | 1.69                                                   | 0.85                                                | 3.24                                                |
| SAMW      | 11.3           | 1.58                                                 | 2.22                                               | 1.33                                                   | 0.15                                                | 8.13                                                |
| SPCW_20   | 0.3            | 2.39                                                 | 7.70                                               | 2.39                                                   | 1.62                                                | 3.16                                                |

**table S2. Mean, SE, median, minimum, and maximum values of viral abundance according to the water masses in the bathypelagic layer (1000 to 4000 m).**

|      | <b>Vol(%)</b> | <b>Mean<br/>(10<sup>6</sup> vir ml<sup>-1</sup>)</b> | <b>SE<br/>(10<sup>5</sup> vir ml<sup>-1</sup>)</b> | <b>Median<br/>(10<sup>6</sup> vir ml<sup>-1</sup>)</b> | <b>Min<br/>(10<sup>5</sup> vir ml<sup>-1</sup>)</b> | <b>Max<br/>(10<sup>6</sup> vir ml<sup>-1</sup>)</b> |
|------|---------------|------------------------------------------------------|----------------------------------------------------|--------------------------------------------------------|-----------------------------------------------------|-----------------------------------------------------|
| CDW  | 27            | 0.60                                                 | 0.79                                               | 0.41                                                   | 0.05                                                | 6.31                                                |
| NADW | 20.5          | 0.53                                                 | 0.78                                               | 0.47                                                   | 0.36                                                | 4.79                                                |
| AABW | 5.8           | 0.35                                                 | 0.92                                               | 0.23                                                   | 0.68                                                | 0.83                                                |

**table S3. Results of the multivariate multiple regression analyses to explain variability of viral abundance in the epipelagic layer (0 to 200 m).** The biological and environmental variables used were: temperature, salinity, AOU (apparent oxygen utilization), Chlorophyll *a* concentration, total prokaryotic abundance and PHP (prokaryotic heterotrophic production), heterotrophic pico/nanoflagellates (HP), *Synechococcus*, *Prochlorococcus*, and picoeukaryote abundances. Only the significantly correlated variables are listed in the table. ALL (All data), ATL (Atlantic Ocean), IN (Indian Ocean), PAC (Pacific Ocean), AOU (Apparent Oxygen Utilization), Chl *a* (Chlorophyll *a* concentration), Syne (*Synechococcus* abundance), Prok (Prokaryotic abundance), PHP (Prokaryotic heterotrophic production), Pico (Picoeukaryote abundances).

| Oceans | n   | R <sup>2</sup> | F-ratio | Parameter    | Coefficients | Prob > t | Std Beta |
|--------|-----|----------------|---------|--------------|--------------|----------|----------|
| ALL    | 494 | 0.29           | 49.1    | Intercept    | 8.92         | <0.0001  | 0        |
|        |     |                |         | Salinity     | -0.06        | <0.0001  | -0.17    |
|        |     |                |         | AOU          | -0.001       | 0.001    | -0.14    |
|        |     |                |         | Chl <i>a</i> | 0.38         | <0.0001  | 0.38     |
|        |     |                |         | Syne         | 0.11         | <0.0001  | 0.28     |
| ATL    | 199 | 0.53           | 42.65   | Intercept    | 7.85         | <0.0001  | 0        |
|        |     |                |         | Temperature  | 0.01         | 0.005    | 0.17     |
|        |     |                |         | Salinity     | -0.1         | <0.0001  | -0.19    |
|        |     |                |         | Chl <i>a</i> | 0.41         | <0.0001  | 0.44     |
|        |     |                |         | Prok         | 0.41         | <0.0001  | 0.25     |
|        |     |                |         | Syne         | 0.08         | 0.002    | 0.21     |
| IN     | 151 | 0.32           | 17.23   | Intercept    | 6.050        | <0.0001  | 0        |
|        |     |                |         | Temperature  | -0.030       | 0.002    | -0.31    |
|        |     |                |         | Chl <i>a</i> | 0.210        | 0.005    | 0.23     |
|        |     |                |         | PHP          | 0.110        | 0.006    | 0.2      |
|        |     |                |         | Prok         | 0.300        | 0.0002   | 0.27     |
| PAC    | 159 | 0.34           | 19.94   | Intercept    | 5.07         | <0.0001  | 0        |
|        |     |                |         | Temperature  | 0.04         | <0.0001  | 0.52     |
|        |     |                |         | AOU          | 0.001        | 0.0007   | 0.41     |
|        |     |                |         | Syne         | 0.11         | 0.0006   | 0.28     |
|        |     |                |         | Pico         | 0.12         | 0.003    | 0.23     |

**table S4. Results of the multivariate multiple regression analyses to explain variability of viral abundance in the mesopelagic layer (200 to 1000 m).** The biological and environmental variables used were: temperature, salinity, AOU (Apparent Oxygen Utilization), total prokaryotic abundance, PHP (Prokaryotic Heterotrophic Production) and heterotrophic pico/nanoflagellates abundance (HP). Only the significant correlated variables are listed in the table. ALL (All data), ATL (Atlantic Ocean), IN (Indian Ocean), PAC (Pacific Ocean), Prok (Prokaryotic abundance), PHP (Prokaryotic heterotrophic production), HP (Heterotrophic protists).

| Oceans | n   | R <sup>2</sup> | F-ratio | Parameter | Coefficients | Prob > t | Std Beta |
|--------|-----|----------------|---------|-----------|--------------|----------|----------|
| ALL    | 157 | 0.33           | 25.39   | Intercept | 2.94         | <0.0001  | 0        |
|        |     |                |         | PHP       | 0.13         | 0.002    | 0.22     |
|        |     |                |         | HP        | 0.23         | 0.03     | 0.16     |
|        |     |                |         | Prok      | 0.57         | <0.0001  | 0.46     |
| ATL    | 76  | 0.36           | 20.63   | Intercept | 2.75         | <0.0001  | 0        |
|        |     |                |         | PHP       | 0.13         | 0.02     | 0.23     |
|        |     |                |         | Prok      | 0.67         | <0.0001  | 0.51     |
| IN     | 60  | 0.17           | 12.18   | Intercept | 6.34         | <0.0001  | 0        |
|        |     |                |         | AOU       | -0.005       | <0.0001  | -0.41    |
| PAC    | 47  | 0.40           | 9.40    | Intercept | 2.83         | <0.0001  | 0        |
|        |     |                |         | PHP       | 0.27         | 0.02     | 0.31     |
|        |     |                |         | HP        | 0.40         | 0.04     | 0.26     |
|        |     |                |         | Prok      | 0.58         | 0.0002   | 0.50     |

**table S5. Results of the multivariate multiple regression analyses to explain variability of viral abundance in the bathypelagic layer (1000 to 4000 m).** The biological and environmental variables used were: temperature, salinity, AOU (Apparent Oxygen Utilization), total prokaryotic abundance, PHP (Prokaryotic Heterotrophic Production) and heterotrophic pico/nanoflagellates abundance (HP). Only the significant correlated variables are listed in the table. ALL (All data), ATL (Atlantic Ocean), IN (Indian Ocean), PAC (Pacific Ocean), AOU (Apparent Oxygen Utilization), Prok (Prokaryotic abundance).

| Oceans | n   | R <sup>2</sup> | F-ratio | Parameter   | Coefficients | Prob > t | Std Beta |
|--------|-----|----------------|---------|-------------|--------------|----------|----------|
| ALL    | 210 | 0.11           | 12.27   | Intercept   | 3.69         | <0.0001  | 0        |
|        |     |                |         | Temperature | 0.05         | 0.02     | 0.16     |
|        |     |                |         | Prok        | 0.37         | <0.0001  | 0.27     |
| ATL    | 89  | 0.13           | 13.4    | Intercept   | 2.45         | 0.005    | 0        |
|        |     |                |         | Prok        | 0.7          | <0.0001  | 0.36     |
| IN     | 63  | 0.22           | 8.64    | Intercept   | 59.46        | <0.0001  | 0        |
|        |     |                |         | Salinity    | -1.57        | 0.0002   | -0.49    |
|        |     |                |         | AOU         | 0.005        | 0.001    | 0.33     |
| PAC    | 58  | 0.12           | 7.81    | Intercept   | 3.00         | 0.002    | 0        |
|        |     |                |         | Prok        | 0.53         | 0.007    | 0.35     |

**table S6. Values of VPL and VPLG.** Values of lytic and lysogenic viral production: mean ( $10^6$  viruses  $\text{ml}^{-1} \text{d}^{-1}$ ), standard error ( $10^5$  viruses  $\text{ml}^{-1} \text{d}^{-1}$ ), median ( $10^6$  viruses  $\text{ml}^{-1} \text{d}^{-1}$ ), minimum ( $10^5$  viruses  $\text{ml}^{-1} \text{d}^{-1}$ ) and maximum ( $10^7$  viruses  $\text{ml}^{-1} \text{d}^{-1}$ ); virus-mediated mortality (VMM) and protist-mediated mortality (PMM) as percentages of the prokaryotic standing stock (PSS) in the surface, DCM (Deep Chlorophyll Maximum) and bathypelagic layers at 11 selected stations: 4 in the Atlantic, 3 in the Indian Ocean, and 4 in the Pacific.

|                     |     | LYSIS |        |        |       |      | LYSOGENY |        |        |       |        | VMM (%PSS) |       |        |       |        | PMM (%PSS) |       |        |       |       |
|---------------------|-----|-------|--------|--------|-------|------|----------|--------|--------|-------|--------|------------|-------|--------|-------|--------|------------|-------|--------|-------|-------|
|                     |     | Mean  | SE     | Median | Min   | Max  | Mean     | SE     | Median | Min   | Max    | Mean       | SE    | Median | Min   | Max    | Mean       | SE    | Median | Min   | Max   |
| <b>SURFACE</b>      | ATL | 1.84  | 7.80   | 0.56   | 2.32  | 0.82 | 4.51     | 13.60  | 6.32   | 0.05  | 90.90  | 6.02       | 2.42  | 2.15   | 0.45  | 25.82  | 25.00      | 3.71  | 27.00  | 12.00 | 43.00 |
|                     | IN  | 20.40 | 103.00 | 17.50  | 0.12  | 6.79 | 60.00    | 324.00 | 0.32   | 0.05  | 20.70  | 36.72      | 18.40 | 0.46   | 0.02  | 121.82 | 3.00       | 0.30  | 3.00   | 2.70  | 3.30  |
|                     | PAC | 8.23  | 18.60  | 6.75   | 7.15  | 1.96 | 10.50    | 44.70  | 3.43   | 5.23  | 3.74   | 30.69      | 4.48  | 33.53  | 10.85 | 57.09  | 27.36      | 7.42  | 19.50  | 5.90  | 61.00 |
|                     | ALL | 9.12  | 0.30   | 2.98   | 0.12  | 6.79 | 22.40    | 100.00 | 3.43   | 0.05  | 207.00 | 22.76      | 5.33  | 13.03  | 0.02  | 121.82 | 23.61      | 3.97  | 19.50  | 2.70  | 61.00 |
| <b>DCM</b>          | ATL | 18.50 | 69.40  | 4.34   | 1.73  | 6.14 | 22.70    | 156.00 | 3.79   | 1.85  | 14.20  | 14.40      | 3.47  | 12.94  | 0.75  | 36.52  | 20.04      | 4.45  | 18.00  | 8.30  | 40.00 |
|                     | IN  | 0.56  | 2.05   | 0.44   | 0.12  | 0.13 | 9.13     | 57.10  | 4.91   | 0.11  | 3.66   | 31.57      | 10.04 | 27.52  | 0.54  | 60.85  | 47.16      | 46.84 | 47.16  | 0.32  | 94.00 |
|                     | PAC | 1.80  | 32.50  | 15.70  | 41.40 | 3.57 | 7.79     | 37.00  | 2.97   | 0.40  | 2.53   | 18.80      | 4.06  | 11.96  | 6.46  | 46.53  | 41.88      | 4.97  | 39.50  | 21.00 | 67.00 |
|                     | ALL | 14.70 | 32.60  | 6.01   | 0.12  | 6.14 | 14.30    | 66.00  | 3.38   | 0.11  | 14.20  | 19.59      | 3.03  | 13.66  | 0.54  | 60.85  | 33.51      | 5.69  | 33.00  | 0.32  | 94.00 |
| <b>BATHYPELAGIC</b> | ATL | 1.28  | 3.50   | 1.14   | 0.03  | 0.36 | 0.05     | 0.47   | 0.00   | 0.00  | 0.01   | 16.91      | 5.25  | 12.88  | 0.00  | 52.91  | 0.31       | 0.04  | 0.32   | 0.16  | 0.42  |
|                     | IN  | 0.15  | 0.23   | 0.17   | 0.46  | 0.02 | 2.39     | 9.63   | 3.19   | 0.85  | 0.48   | 4.72       | 1.00  | 4.00   | 1.77  | 8.78   | 0.28       | 0.10  | 0.28   | 0.09  | 0.50  |
|                     | PAC | 7.49  | 29.10  | 2.24   | 10.60 | 2.34 | 1.11     | 6.25   | 0.24   | 0.46  | 0.31   | 54.06      | 20.80 | 22.90  | 5.99  | 166.96 | 0.39       | 0.20  | 0.22   | 0.08  | 1.20  |
|                     | ALL | 3.44  | 12.90  | 1.25   | 0.03  | 2.34 | 1.36     | 4.88   | 0.16   | 0.004 | 0.48   | 26.56      | 8.58  | 8.81   | 0.00  | 167.00 | 0.33       | 0.07  | 0.29   | 0.09  | 1.20  |

**table S7. Mean and SE of the estimated C, N, and P released by viruses and that incorporated by grazers in the three layers (surface, DCM, and bathypelagic).**

|                     | <b>CARBON<br/>RELEASED<br/>BY VIRUSES<br/>(<math>\mu\text{g C L}^{-1} \text{d}^{-1}</math>)</b> | <b>CARBON<br/>INCORPORATED<br/>BY GRAZERS<br/>(<math>\mu\text{g C L}^{-1} \text{d}^{-1}</math>)</b> | <b>NITROGEN<br/>RELEASED BY<br/>VIRUSES<br/>(<math>\mu\text{g N L}^{-1} \text{d}^{-1}</math>)</b> | <b>NITROGEN<br/>INCORPORATED<br/>BY GRAZERS<br/>(<math>\mu\text{g N L}^{-1} \text{d}^{-1}</math>)</b> | <b>PHOSPORUS<br/>RELEASED<br/>BY VIRUSES<br/>(<math>\mu\text{g P L}^{-1} \text{d}^{-1}</math>)</b> | <b>PHOSPORUS<br/>INCORPORATED<br/>BY GRAZERS<br/>(<math>\mu\text{g P L}^{-1} \text{d}^{-1}</math>)</b> |
|---------------------|-------------------------------------------------------------------------------------------------|-----------------------------------------------------------------------------------------------------|---------------------------------------------------------------------------------------------------|-------------------------------------------------------------------------------------------------------|----------------------------------------------------------------------------------------------------|--------------------------------------------------------------------------------------------------------|
| <b>SURFACE</b>      | 1.15 ( $\pm$ 0.25)                                                                              | 1.15 ( $\pm$ 0.19)                                                                                  | 0.22 ( $\pm$ 0.05)                                                                                | 0.22 ( $\pm$ 0.04)                                                                                    | 0.04 ( $\pm$ 0.008)                                                                                | 0.04 ( $\pm$ 0.0003)                                                                                   |
| <b>DCM</b>          | 0.94 ( $\pm$ 0.17)                                                                              | 1.83 ( $\pm$ 0.33)                                                                                  | 0.18 ( $\pm$ 0.03)                                                                                | 0.35 ( $\pm$ 0.06)                                                                                    | 0.03 ( $\pm$ 0.005)                                                                                | 0.06 ( $\pm$ 0.004)                                                                                    |
| <b>BATHYPELAGIC</b> | 0.15 ( $\pm$ 0.05)                                                                              | 0.002 ( $\pm$ 0.001)                                                                                | 0.03 ( $\pm$ 0.008)                                                                               | 0.0005 ( $\pm$ 0.0002)                                                                                | 0.005 ( $\pm$ 0.002)                                                                               | 0.00005 ( $\pm$ 0.00004)                                                                               |

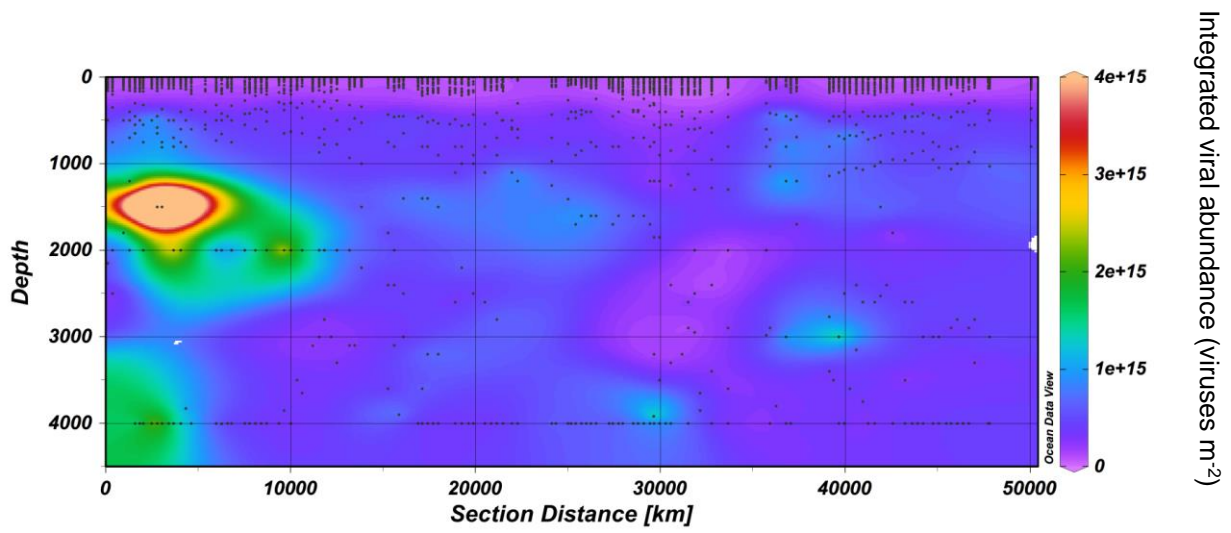

**fig. S1. Viral abundance with depth along the entire cruise visualized with Ocean Data View.** The track is separated in the oceanic regions indicated in Figure 1A. Small dots indicate sampling points.



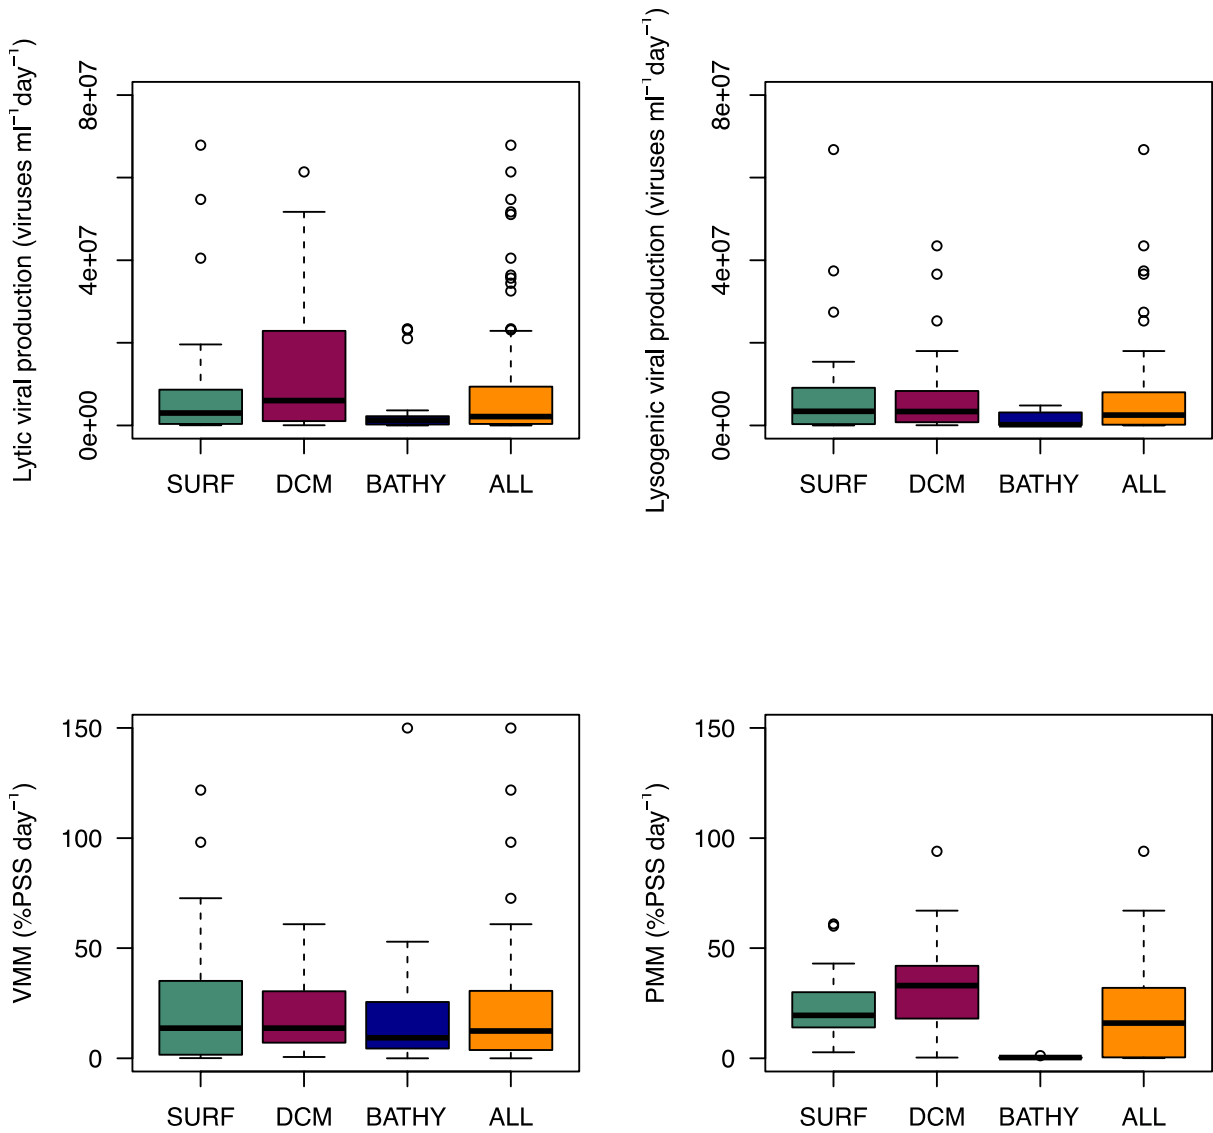

**fig. S2. VPL and VPLG and prokaryotic mortality due to viruses.** Lytic and lysogenic viral production at (A, B) the surface, the DCM (Deep Chlorophyll Maximum) and 4,000 m depth in 11 selected stations: 4 in the Atlantic, 3 in the Indian Ocean and 4 in the Pacific. Virus-mediated mortality (VMM) and protist-mediated mortality (PMM) expressed as percentages of the prokaryotic standing stock per day (PSS) at (C, D) the surface, DCM and bathypelagic layers. Also presented, all the data summarized from all the Tropical and Subtropical Ocean as ALL.
